# Supplementary material
Source: Research Square preprint supplement (doi:10.21203/rs.3.rs-10095075/v1)
Supplement: Supplementary file 1 [file 08e66672767550eb4d6a811c.docx]

**Supplementary materials**

**Table S1.** **Haul-level distribution of vitality scores of *P. trituberculatus* under different trawling durations.**

| **Haul ID** | **0 (Dead)** | **1 (Moribund)** | **2 (Weak)** | **3 (Healthy)** | **4 (Very healthy)** |
| --- | --- | --- | --- | --- | --- |
| H1 | 0 | 0 | 7 | 10 | 7 |
| H2 | 0 | 2 | 4 | 28 | 17 |
| H3 | 0 | 2 | 5 | 34 | 27 |
| H4 | 3 | 5 | 6 | 27 | 14 |
| H5 | 1 | 0 | 0 | 7 | 4 |
| H6 | 3 | 3 | 6 | 17 | 6 |
| H7 | 1 | 3 | 3 | 3 | 3 |
| H8 | 4 | 14 | 30 | 60 | 28 |
| H9 | 5 | 11 | 26 | 43 | 19 |
| H10 | 6 | 14 | 9 | 42 | 17 |
| H11 | 3 | 9 | 10 | 40 | 18 |

**Table S2. Haul-level distribution of external damage scores of *P. trituberculatus* under different trawling durations.**

| **Haul ID** | **0 (Flawless)** | **1 (Slight)** | **2 (Moderate)** | **3 (Severe)** |
| --- | --- | --- | --- | --- |
| H1 | 17 | 5 | 2 | 0 |
| H2 | 34 | 12 | 4 | 1 |
| H3 | 45 | 17 | 5 | 1 |
| H4 | 34 | 15 | 5 | 1 |
| H5 | 6 | 3 | 2 | 1 |
| H6 | 16 | 8 | 9 | 2 |
| H7 | 7 | 2 | 3 | 1 |
| H8 | 65 | 34 | 32 | 5 |
| H9 | 23 | 43 | 32 | 6 |
| H10 | 19 | 38 | 26 | 5 |
| H11 | 15 | 34 | 28 | 3 |
