# Supplementary material
Source: Research Square preprint supplement (doi:10.21203/rs.3.rs-10095075/v1)
Supplement: Supplementary file 2 [file 4172b2ffdd181cd9f85eb1fb.docx]

- Shorter trawling duration improved survival, vitality, and external integrity of *Portunus trituberculatus*.
- Prolonged trawling intensified physical damage and elevated hemolymph lactate.
- Damage, vitality, and lactate showed coordinated response patterns.
- Integrated multiple-dimensional indicators support post-capture welfare and quality control.
