# Supplementary material
Source: Research Square preprint supplement (doi:10.21203/rs.3.rs-10095075/v1)
Supplement: Supplementary file 3 [file 7a3ed1bc79679813ccdb2bf7.docx]

**Declaration of interests**

The authors declare that they have no known competing financial interests or personal relationships that could have appeared to influence the work reported in this paper.

The authors declare the following financial interests/personal relationships which may be considered as potential competing interests:
